# Supplementary material
Source: MDPI journal article supplement (https://www.mdpi.com/2673-6918/3/1/6)
Supplement: s1 [file s1]

---

## Supplementary Materials

### Caryophyllene-Rich Essential Oils of Two Species from Southern Côte d'Ivoire: *Guibourtia ehie* (A. Chev.) J Léonard (Caesalpiniaceae) and *Oricia suaveolens* (Engl.) Verd. (Rutaceae)

Toffé Alexis Kouao<sup>1</sup>, Zana Adama Ouattara<sup>1</sup>, Didjour Albert Kambiré<sup>2</sup>, Bosson Antoine Kouamé<sup>1</sup>, Janat Akhanovna Mamyrbékova-Békro<sup>1</sup>, Pierre Tomi<sup>3</sup>, Mathieu Paoli<sup>3</sup>, Ange Bighelli<sup>3</sup>, Yves-Alain Békro<sup>1</sup> and Felix Tomi<sup>3,\*</sup>

<sup>1</sup> Laboratoire de Chimie Bio-Organique et de Substances Naturelles, Université Nangui Abrogoua, 02 BP 801 Abidjan 02, Côte d'Ivoire

<sup>2</sup> UPR de Chimie Organique, Département de Mathématiques-Physique-Chimie, Université Péléforo GON COULIBALY, BP 1328 Korhogo, Côte d'Ivoire

<sup>3</sup> Laboratoire Sciences Pour l'Environnement, Université de Corse—CNRS, UMR 6134 SPE, Route des Sanguinaires, 20000 Ajaccio, France

\* Correspondence: tomi\_f@univ-corse.fr

**Table S1.** Yields of hydrodistillation.

| Essential oil           | Leaves |      |      | Stem bark |      |      |      |      | Root bark |      |      |      |      |
|-------------------------|--------|------|------|-----------|------|------|------|------|-----------|------|------|------|------|
| <i>Oricia</i>           | F1     | F2   | F3   |           | T1   | T2   | T3   | T4   | R1        | R2   | R3   | R4   | R5   |
| <i>suaveolens</i>       | 0.06   | 0.05 | 0.08 |           | 0.01 | 0.01 | 0.03 | 0.02 | 0.01      | 0.01 | 0.02 | 0.02 | 0.02 |
| <i>Guirboutia. ehie</i> | G1     | G2   | G3   | G4        |      |      |      |      |           |      |      |      |      |
|                         | 0.05   | 0.04 | 0.05 | 0.01      |      |      |      |      |           |      |      |      |      |
